# Supplementary material for: A Novel lncRNA-Mediated Signaling Axis Governs Cancer Stemness and Splicing Reprogramming in Hepatocellular Carcinoma with Therapeutic Potential
Source: Research Square preprint supplement (doi:10.21203/rs.3.rs-6969931/v1), 2025-09-23
Supplement: Supplementary file 1 [file 2bf95d67c93c2b16bdf34c58.pdf]

## Supplementary Figures

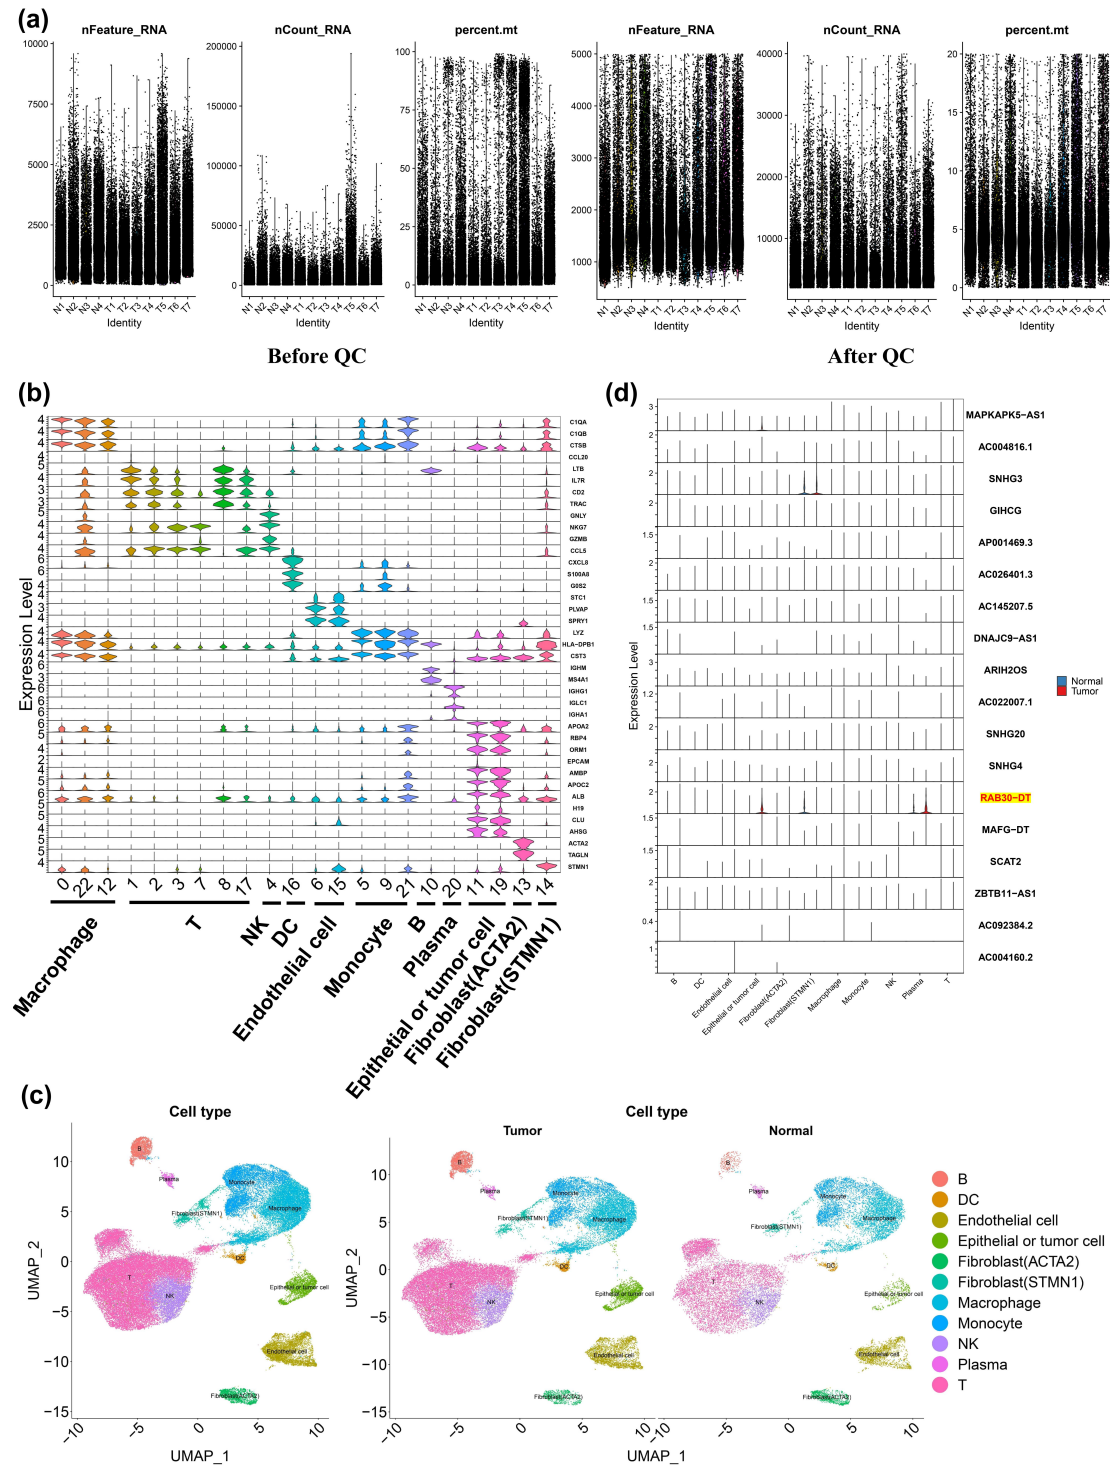

**Supplementary Fig. 1. Quality control and analysis of the scRNA-SEQ dataset GSE202642. (a)** Data quality control metrics, including the number of genes detected per cell, total counts, and mitochondrial gene content. **(b)** Cell type annotation based on canonical marker gene expression. **(c)** UMAP plot displaying distinct cell clusters identified in HCC tissue from the GSE202642

dataset. **(d)** Expression patterns of 19 splicing- and stemness-related lncRNAs across different cell types in HCC tissues.

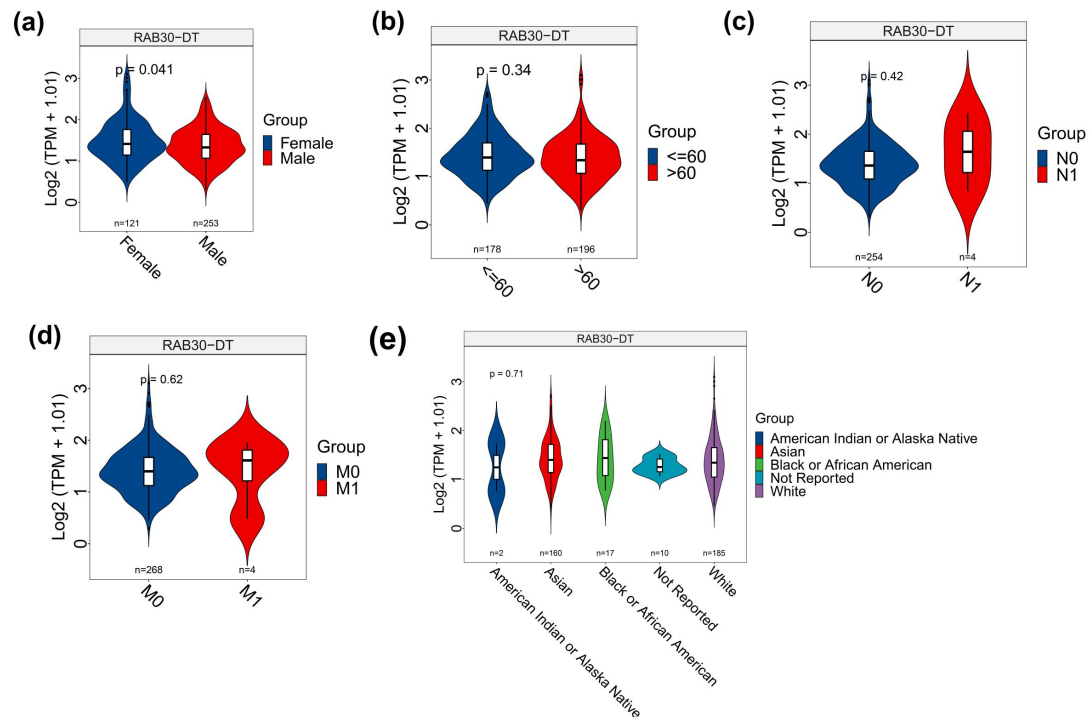

**Supplementary Fig. 2. Association of LncRNA *RAB30-DT* expression with clinical characteristics in HCC patients. (a, b) *RAB30-DT* expression differs significantly between male and female patients but shows no association with age. (c, d) No significant correlation is observed between *RAB30-DT* expression and metastasis status or lymph node involvement. (e) *RAB30-DT* expression does not differ significantly among different racial groups.**

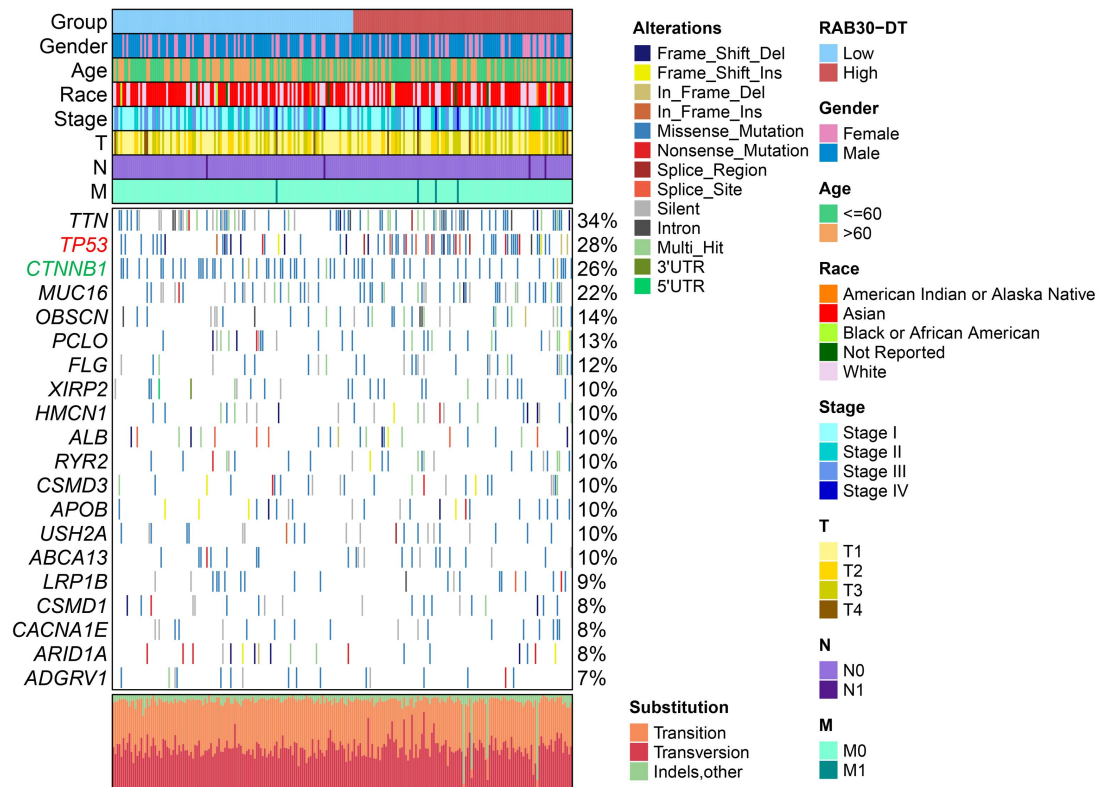

**Supplementary Fig. 3. Waterfall plot of somatic mutations in HCC patients with high versus low lncRNA *RAB30-DT* expression from TCGA-LIHC data analysis.**

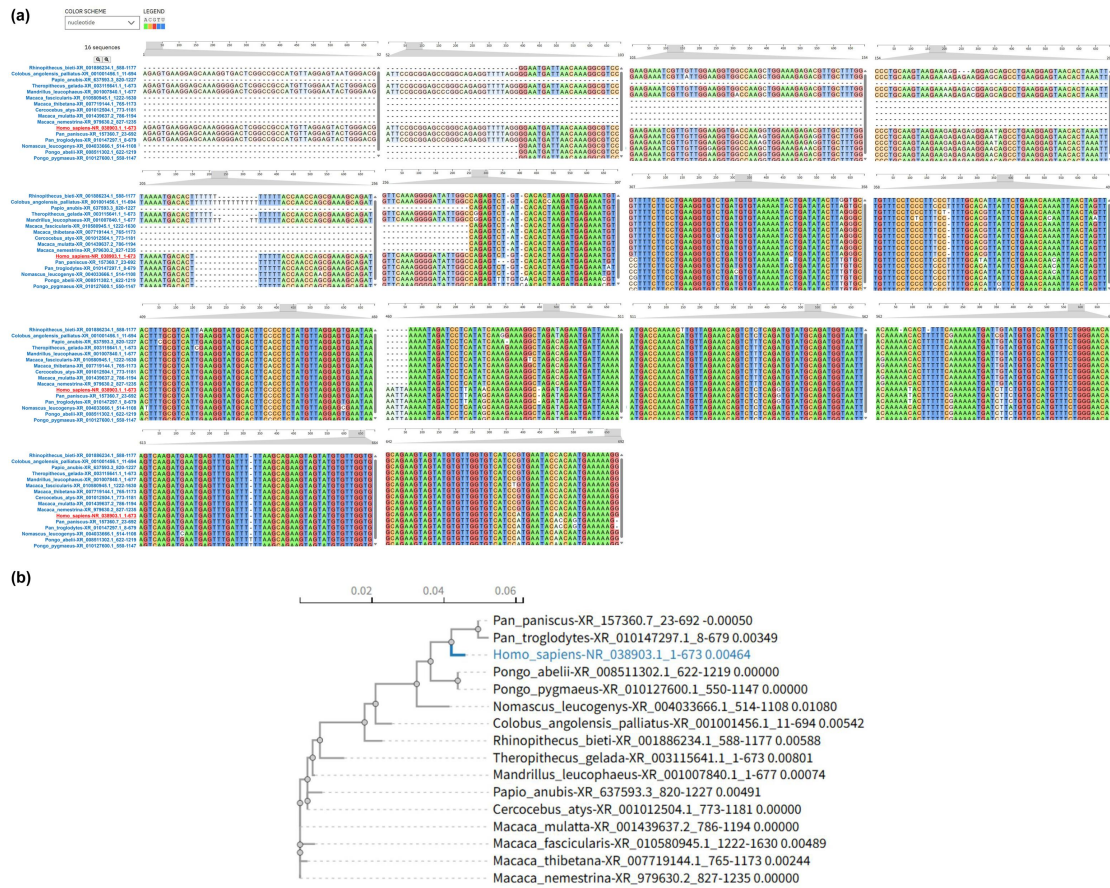

**Supplementary Fig. 4. LncRNA *RAB30-DT* exhibits high sequence conservation among primates. (a)** Multiple sequence alignment of human *RAB30-DT* with its orthologous transcripts in other primate species, generated using Clustal Omega. **(b)** Phylogenetic tree constructed based on *RAB30-DT* and its orthologous transcript sequences across primates, using Clustal Omega.



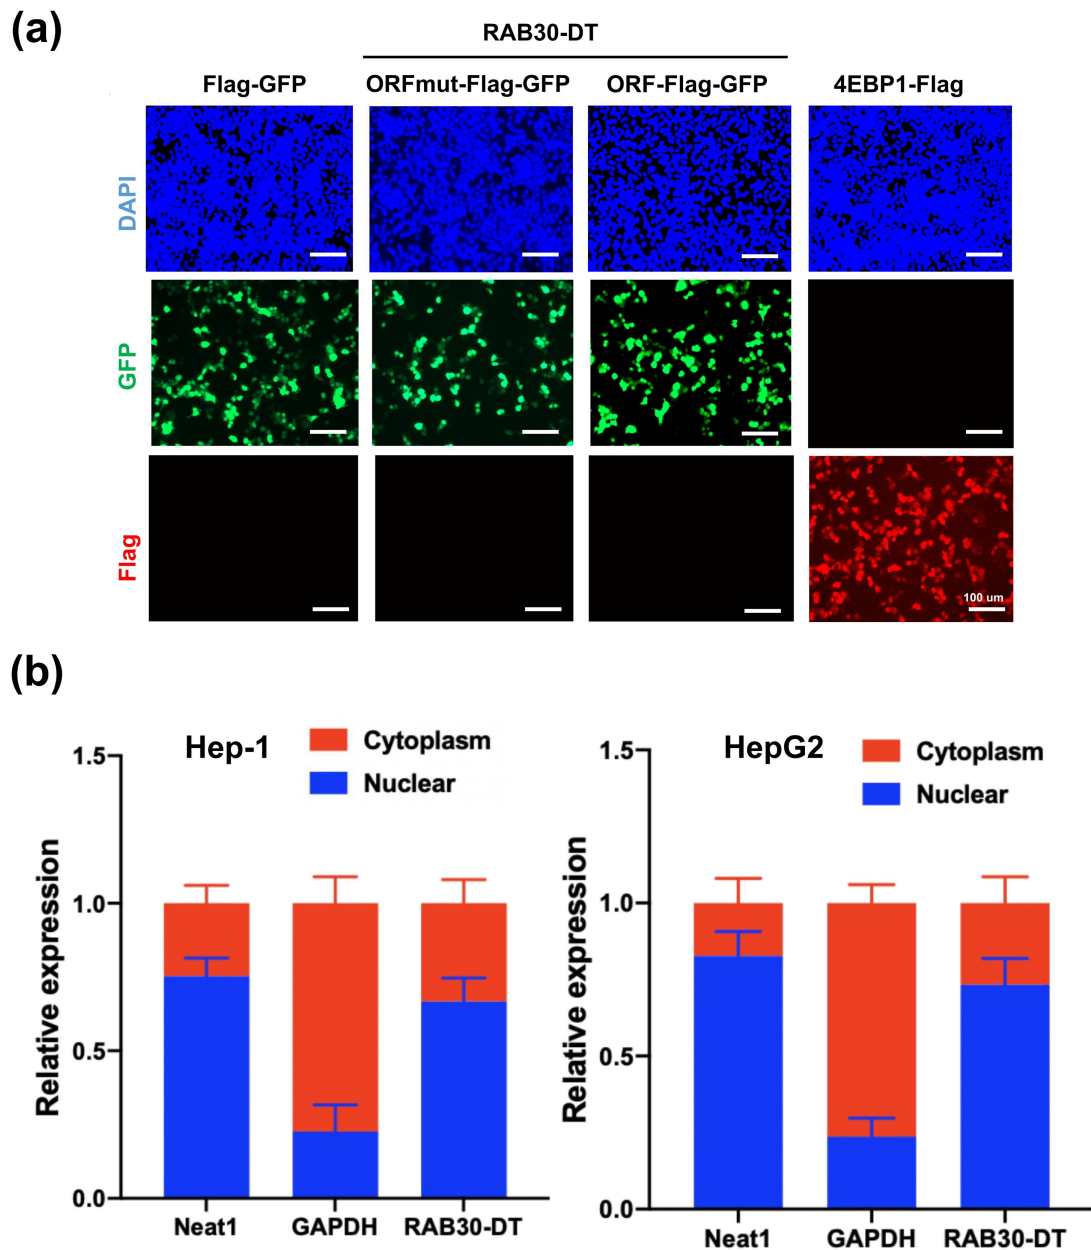

**Supplementary Fig. 5. Characterization of the coding potential and subcellular localization of lncRNA *RAB30-DT*.** (a) Immunofluorescence analysis indicates that *RAB30-DT* does not encode a detectable protein. (b) Nucleus-cytoplasm fractionation followed by qPCR reveals that *RAB30-DT* is predominantly localized in the nucleus.

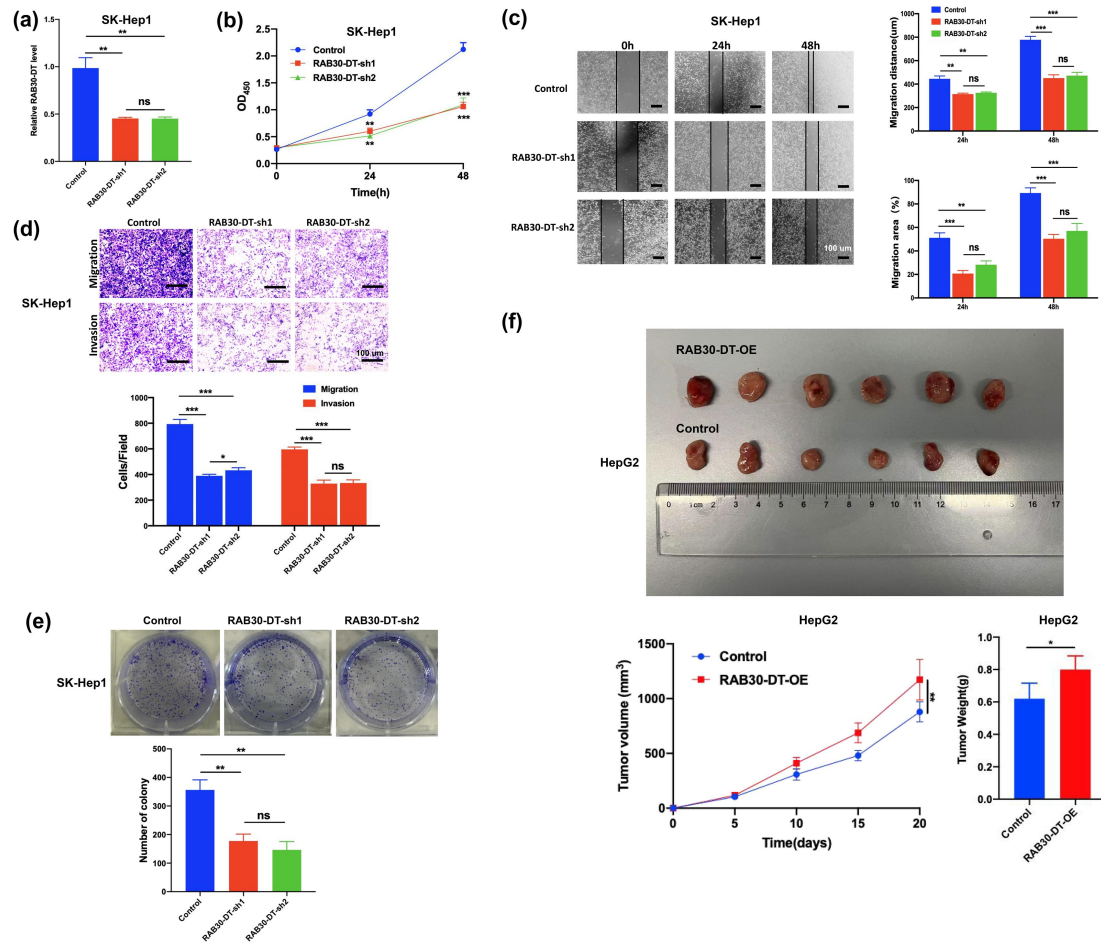

**Supplementary Fig. 6. Functional effects of RAB30-DT in SK-Hep-1 cells and in vivo tumorigenesis.** (a) qPCR validation of RAB30-DT knockdown efficiency in SK-Hep-1 cells. RAB30-DT knockdown suppresses (b) proliferation, (c) migration, (d) invasion, and (e) colony formation in SK-Hep-1 cells, whereas RAB30-DT overexpression promotes xenograft tumor growth of HepG2 cells in nude mice (f).

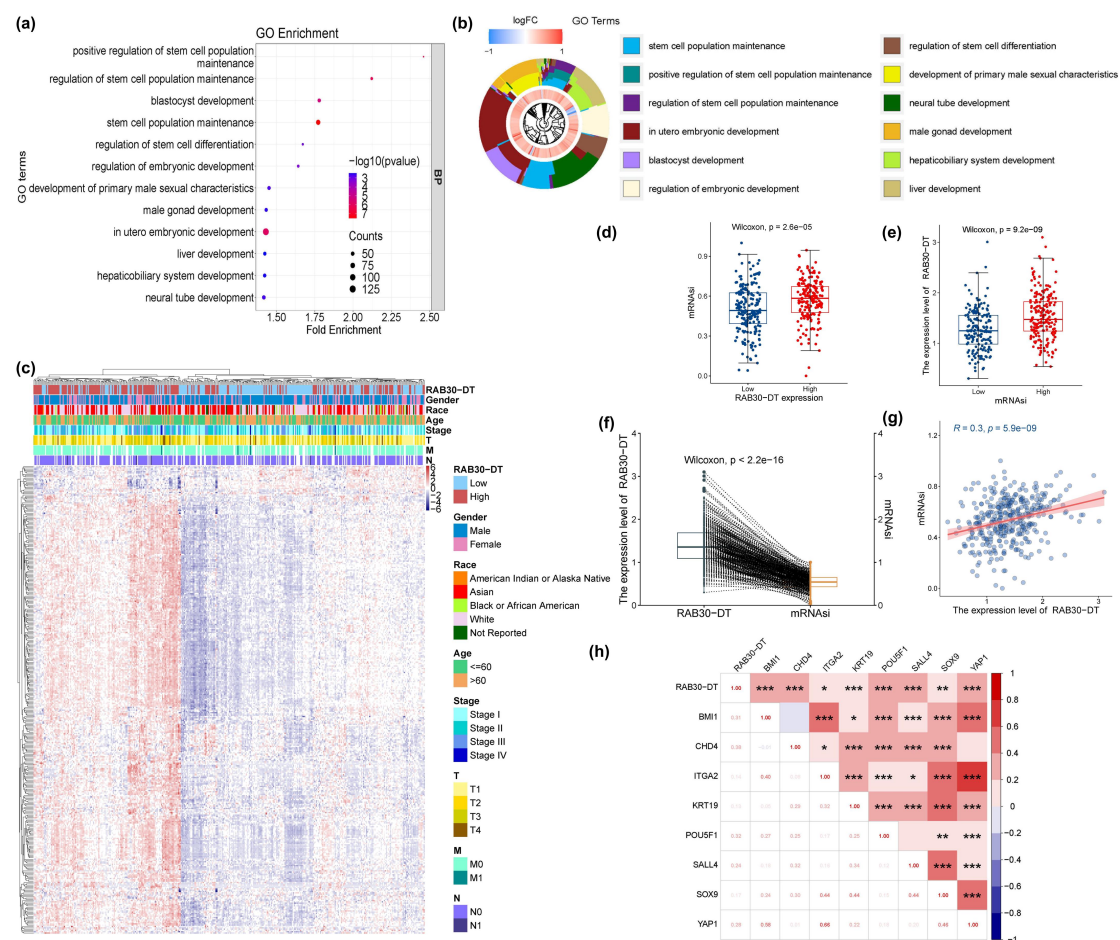

**Supplementary Fig. 7. LncRNA *RAB30-DT* expression is positively associated with tumor stemness. (a–b)** Gene Ontology analysis of differentially expressed genes (DEGs) between high and low *RAB30-DT* expression groups in TCGA–LIHC. **(c)** Heatmap of DEGs enriched in stemness-related pathways between high and low *RAB30-DT* expression groups. **(d–g)** *RAB30-DT* expression is significantly positively correlated with mRNA<sub>si</sub> scores. **(h)** Positive correlation between *RAB30-DT* expression and cancer stemness-related genes.

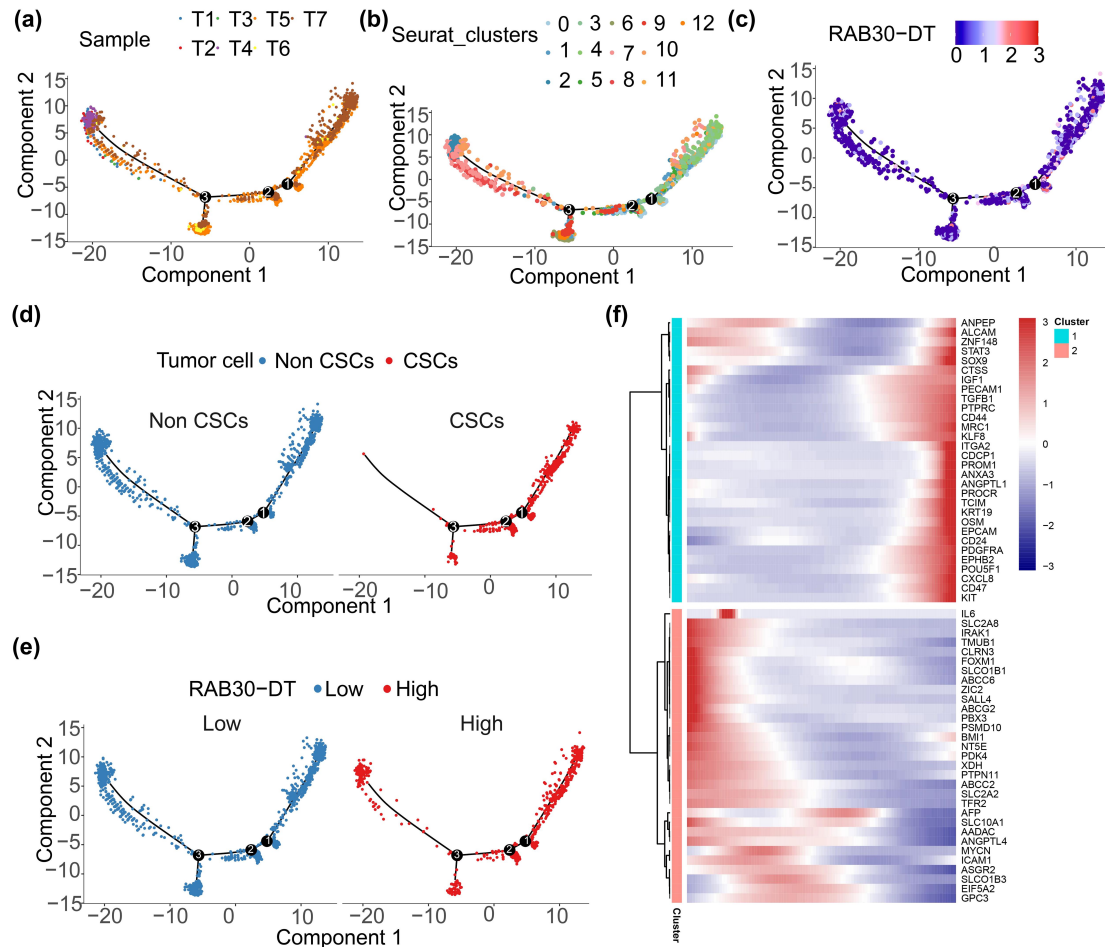

**Supplementary Fig. 8. Pseudotime trajectory analysis reveals that high lncRNA *RAB30-DT* expression occurs in early pseudotime stages and is associated with elevated stemness potential in malignant cells. (a)** Pseudotime trajectory of tumor epithelial cells across different HCC patients, showing inferred developmental progression. **(b)** Pseudotime trajectory of HCC cells colored by distinct cell clusters. **(c)** Pseudotime trajectory highlighting HCC cells with different levels of *RAB30-DT* expression. **(d)** Pseudotime distribution of cancer stem-like cells (CSCs) and non-CSCs, indicating their temporal positioning. **(e)** Comparison of pseudotime trajectories between *RAB30-DT* high- and low-expressing HCC cells. **(f)** Branched Expression Analysis Modeling identifies genes differentially expressed at the trajectory branching point, potentially involved in cell fate decisions.

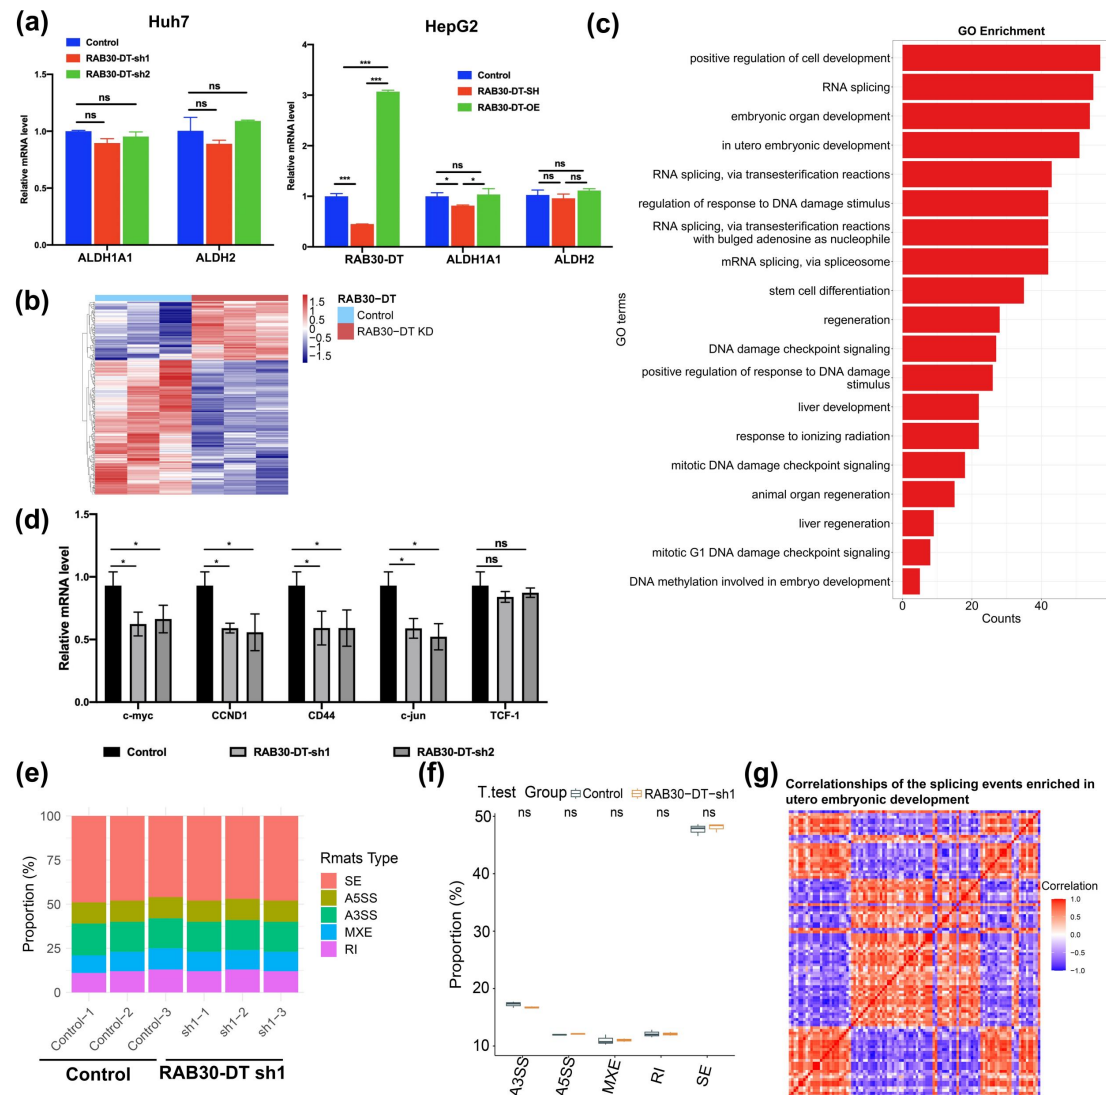

**Supplementary Fig. 9. RNA-SEQ and alternative splicing analysis reveal the impact of lncRNA *RAB30-DT* knockdown in HCC cells.** (a) qPCR analysis of *ALDH1A1* and *ALDH2* expression following *RAB30-DT* knockdown or overexpression in Huh7 and HepG2 cells. (b) Heatmap showing global gene expression changes in *RAB30-DT* knockdown versus control cells. (c) GO analysis of DEGs in *RAB30-DT* knockdown cells. (d) qPCR validation of DEGs in stemness-related pathways upon *RAB30-DT* knockdown. (e–f) Proportional distribution of alternative splicing (AS) event types between *RAB30-DT* knockdown and control cells. (g) Co-occurrence network of differentially spliced genes between *RAB30-DT* knockdown and control groups.



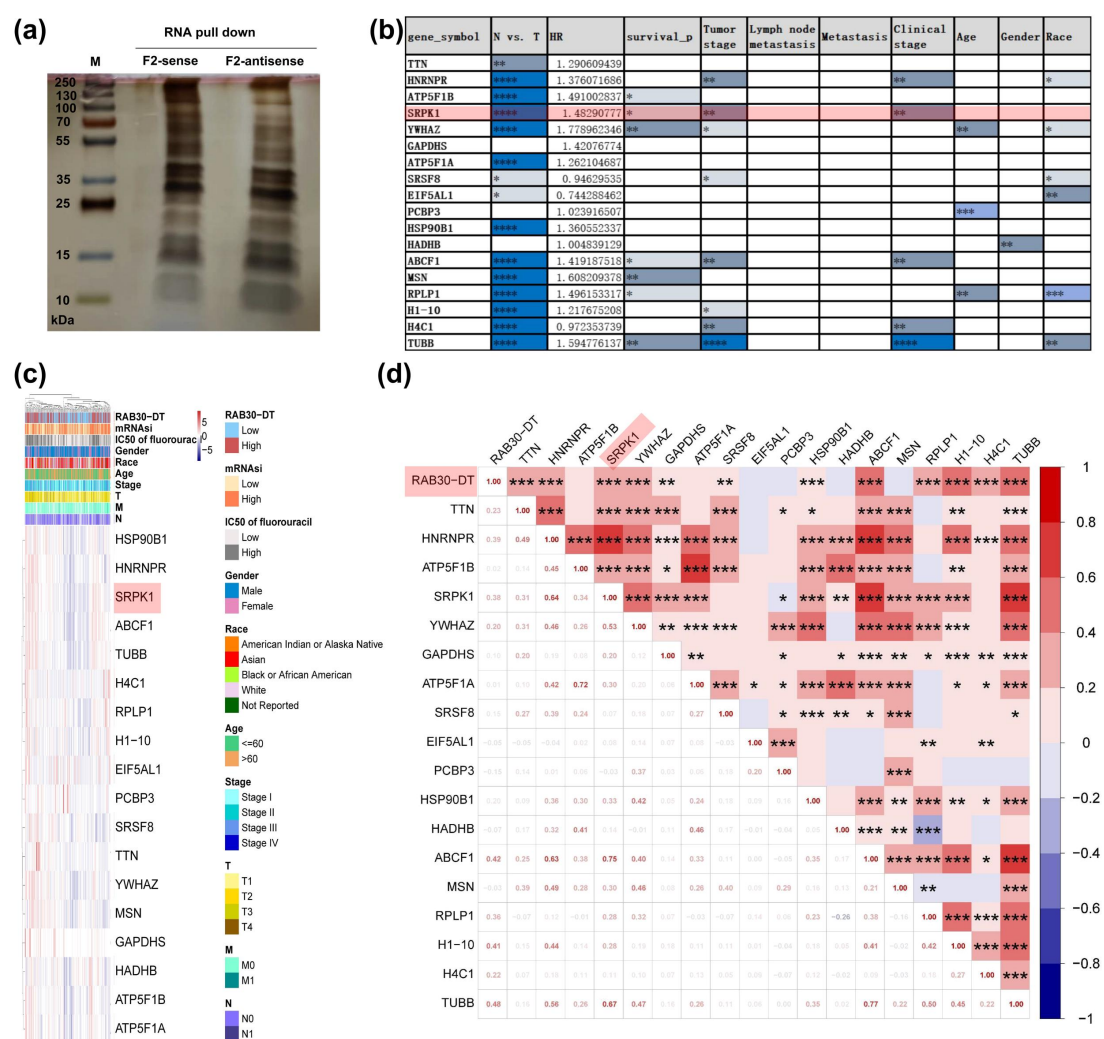

**Supplementary Fig. 10. RNA pull-down proteomics identifies binding partners of lncRNA *RAB30-DT*.** (a) Silver staining following RNA pull-down reveals differential proteins pulled down by the sense and antisense strands of *RAB30-DT*. (b) TCGA-LIHC analysis of RNA pull-down proteins, followed by mass spectrometry, identifies specific proteins whose gene expression correlates with HCC development and prognosis. (c) TCGA-LIHC analysis shows that the expression of RNA pull-down identified proteins is obviously elevated in HCC patients with high *RAB30-DT* expression. (d) The gene expression of RNA pull-down proteins correlate significantly with *RAB30-DT* expression, as demonstrated by mass spectrometry analysis.

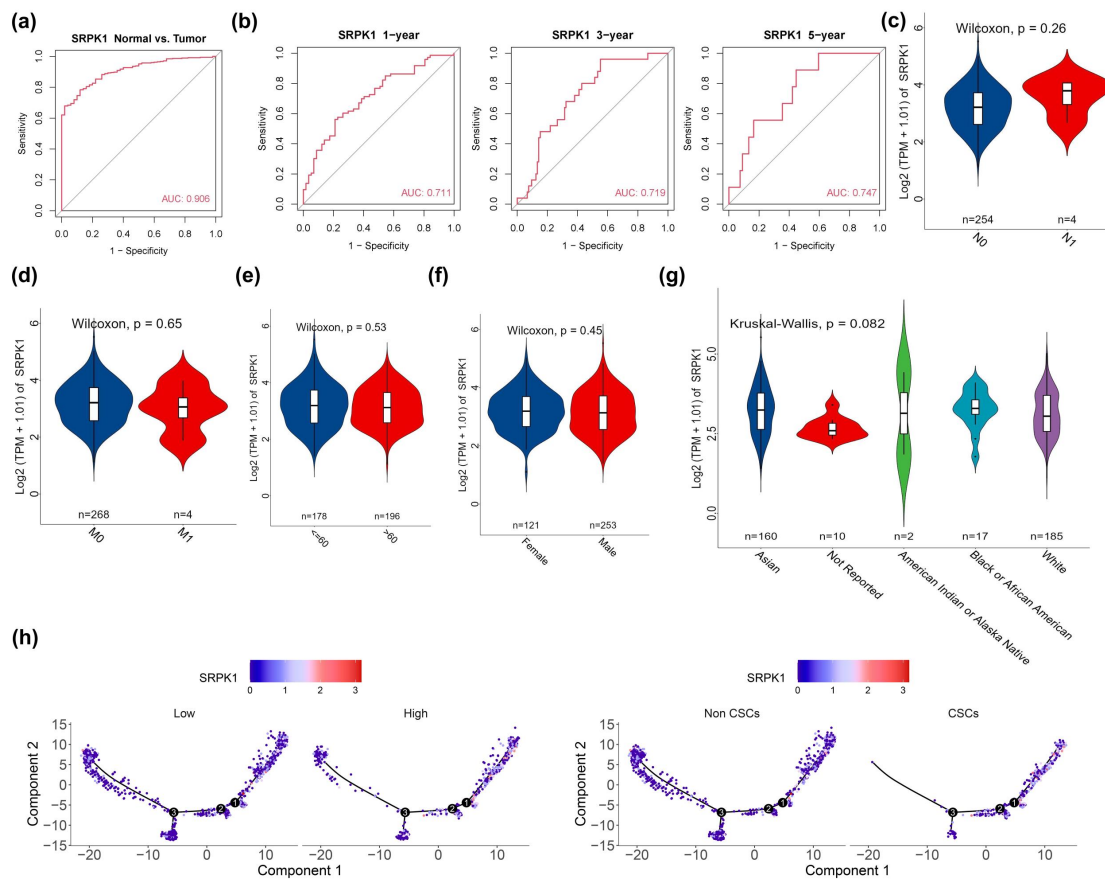

**Supplementary Fig. 11. Clinical relevance of *SRPK1* in HCC.** (a) *SRPK1* is significantly upregulated in HCC tissues (TCGA–LIHC). (b) *SRPK1* expression predicts 1-, 3-, and 5-year survival outcomes in HCC patients. (c–g) Correlations of *SRPK1* expression with lymph node metastasis, distant metastasis, age, gender, and race. (h) Pseudotime analysis links *SRPK1* expression with malignant cell differentiation states.

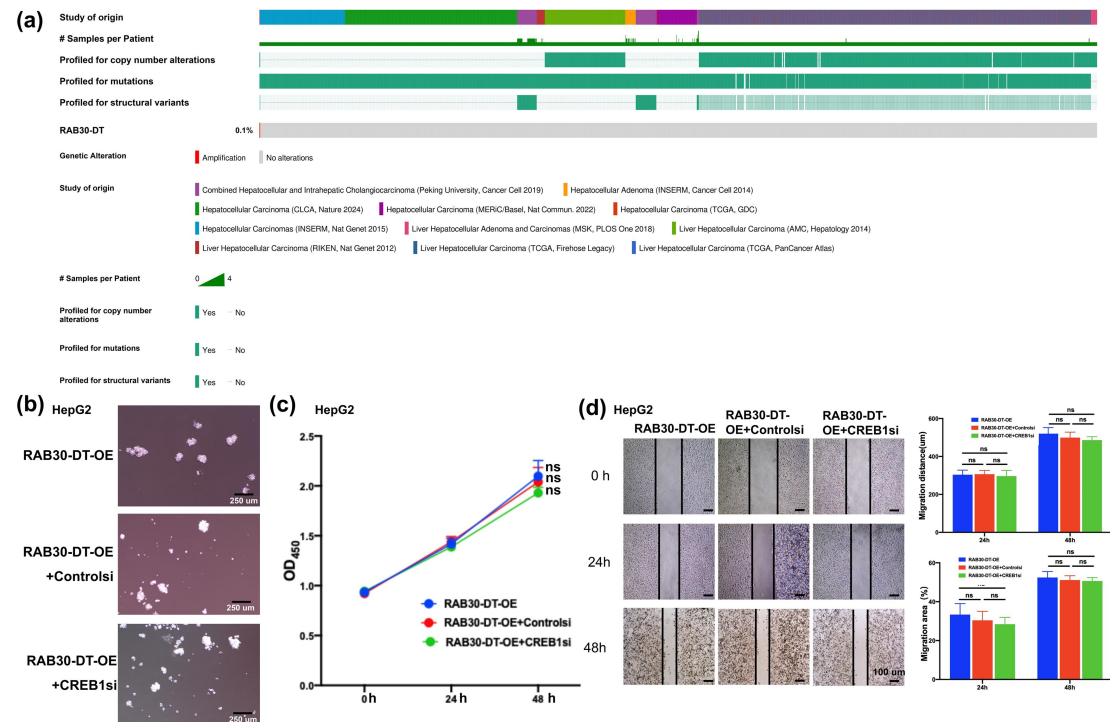

**Supplementary Fig. 12. *RAB30-DT* functions downstream of *CREB1* to regulate tumor stemness and malignancy in HCC.** (a) cBioPortal analysis reveals that genomic alterations of the lncRNA *RAB30-DT* are rare in hepatocellular carcinoma (HCC). (b–d) Functional assays assessing the impact of *CREB1* knockdown in HepG2 cells overexpressing *RAB30-DT* on tumor stemness (b), proliferation (c), and migration (d).
